# Supplementary material for: Triggering Bimodal Radial Stem Growth in Pinus sylvestris at a Drought-Prone Site by Manipulating Stem Carbon Availability
Source: Frontiers journal article supplement (doi:10.3389/fpls.2021.674438), 2021-05-28
Supplement: Image_1.pdf [file Image_1.pdf]

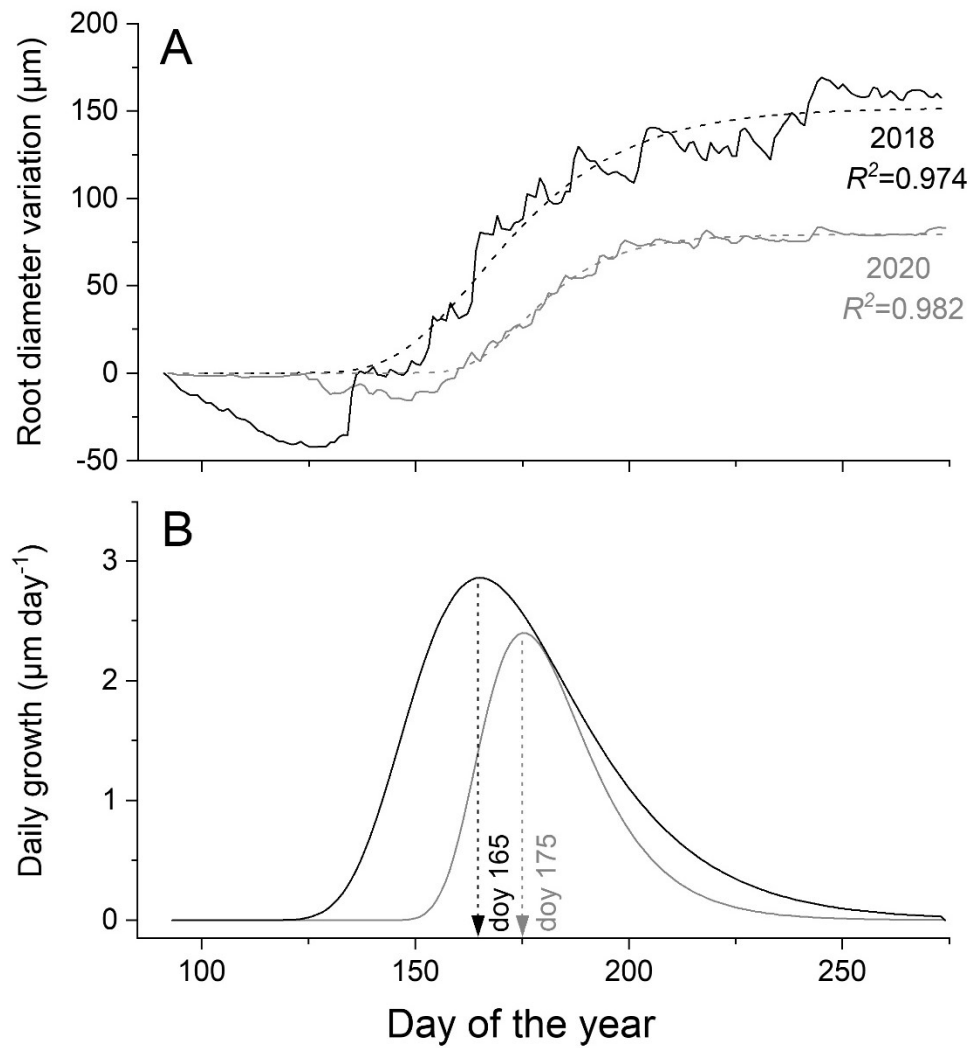

**Supplementary Figure 1** | Time series of mean daily dendrometer records of roots (diameter *c.* 10 mm) of mature *Pinus sylvestris* trees. Root growth in 2018 ( $n=2$ ) and 2020 ( $n=2$ ) is shown in black and grey lines, respectively. Modelled intra-annual growth by applying the Gompertz function is indicated by dashed lines (**A**). Daily growth calculated from Gompertz function is depicted in (**B**). Peaks in daily growth are indicated (doy = day of the year).
